# Supplementary material for: Comparison of Anesthesia Times and Billing Patterns by Anesthesia Practitioners
Source: PubMed Central journal article supplement (PMC6324364; doi:10.1001/jamanetworkopen.2018.4288), 2018-11-09
Supplement: jamanetwopen-1-e184288-s001.pdf [file jamanetwopen-1-e184288-s001.pdf]

## Supplementary Online Content

Sun EC, Dutton RP, Jena AB. Comparison of anesthesia times and billing patterns by anesthesia practitioners. *JAMA Netw Open*. 2018;1(7):e184288. doi:10.1001/jamanetworkopen.2018.4288

**eTable 1.** List of Medical Comorbidities and ICD-9 Codes

**eTable 2.** Regression Coefficients for Case Prediction

**eTable 3.** Differences in Type of Institution Between Included and Excluded Cases

**eTable 4.** Distribution of Surgical CPTs Between Included and Excluded Cases

**eMethods.** Regression Model

**eFigure.** Distribution of Anesthesia Times

This supplementary material has been provided by the authors to give readers additional information about their work.

**eTable 1.** List of Medical Comorbidities and ICD-9 Codes

|                                       |                                                                                                                                         |
|---------------------------------------|-----------------------------------------------------------------------------------------------------------------------------------------|
| Congestive Heart Failure              | 398.91, 402.01, 402.11, 402.91, 404.01, 404.03, 404.11, 404.13, 404.91, 404.93, 425.4-425.9, 428.x                                      |
| Peripheral Vascular Disease           | 093.0, 437.3, 440.x, 441.x, 443.1-443.9, 447.1, 557.1, 557.9, V43.4                                                                     |
| Hypertension                          | 401-405                                                                                                                                 |
| Chronic Obstructive Pulmonary Disease | 416.8, 416.9, 490.x-505.x, 506.4, 508.1, 508.8                                                                                          |
| Diabetes Mellitus                     | 250.x                                                                                                                                   |
| Chronic Kidney Disease                | 403.01, 403.11, 403.91, 404.02, 404.03, 404.12, 404.13, 404.92, 404.93, 585.x, 586.x, 588.0, V42.0, V45.1, V56.x                        |
| Cancer                                | 140.x-172.x, 174.x-202.x, 203.0, 238.6                                                                                                  |
| Cerebrovascular Disease               | 430.x-438.x                                                                                                                             |
| Myocardial Infarction                 | 410.x, 412.x                                                                                                                            |
| Dementia                              | 290.x                                                                                                                                   |
| Liver Disease                         | 070.22, 070.23, 070.32, 070.33, 070.44, 070.54, 070.6, 070.9, 456.0-456.2, 570.x, 571.x, 572.2-572.8, 573.3, 573.4, 573.8, 573.9, V42.7 |
| Alcohol Abuse                         | 265.2, 291.1-291.3, 291.5-291.9, 303.0, 303.9, 305.0, 357.5, 425.5, 535.3, 571.0-571.3, 980.x, V11.3                                    |
| Drug Abuse                            | 292.x, 304.x, 305.2-305.9, V65.42                                                                                                       |
| Schizophrenia                         | 293.8, 295.x, 296.04, 296.14, 296.44, 296.54, 297.x, 298.x                                                                              |
| Depression                            | 296.2, 296.3, 296.5, 300.4, 309.x, 311                                                                                                  |

**eTable 2.** Regression Coefficients for Case Prediction<sup>c</sup>

|                                          | Regression Coefficient       | p      |
|------------------------------------------|------------------------------|--------|
| Patient Comorbidities                    |                              |        |
| Congestive Heart Failure                 | 0.024<br>(0.013 to 0.033)    | <0.001 |
| Peripheral Vascular Disease              | 0.036<br>(0.022 to 0.049)    | <0.001 |
| Hypertension                             | 0.012<br>(0.006 to 0.017)    | <0.001 |
| Chronic Obstructive<br>Pulmonary Disease | 0.12<br>(-0.07 to 0.31)      | 0.22   |
| Diabetes Mellitus                        | 0.021<br>(0.016-0.026)       | <0.001 |
| Chronic Kidney Disease                   | 0.022<br>(0.010-0.034)       | <0.001 |
| Cancer                                   | 0.11<br>(0.11-0.12)          | <0.001 |
| Cerebrovascular Disease                  | 0.019<br>(-0.00 to 0.038)    | 0.06   |
| Dementia                                 | -0.075<br>(-0.12 to -0.03)   | <0.001 |
| Myocardial Infarction                    | 0.016<br>(0.003 to 0.028)    | 0.013  |
| Liver Disease                            | -0.073<br>(-0.086 to -0.059) | <0.001 |
| Alcohol Abuse                            | 0.026<br>(0.007 to 0.047)    | 0.007  |
| Drug Abuse                               | -0.003<br>(-0.038 to 0.032)  | 0.876  |
| Psychosis                                | 0.011<br>(-0.010 to 0.032)   | 0.315  |
| Depression                               | -0.018<br>(-0.033 to -0.003) | 0.016  |
| Male (relative to female)                | 0.026<br>(0.025 to 0.027)    | <0.001 |
| Constant                                 | 0.026<br>(0.025 to 0.027)    | <0.001 |
| R <sup>2</sup>                           | 0.68                         |        |

<sup>c</sup>**eTable 2** provides some regression results from the regression equation used to estimate predicted case lengths. Details on this regression equation are provided in the **eMethods**. 95% confidence intervals shown in parentheses. Due to the extremely large number of variables, the coefficients for the surgery, facility, and age effects are not presented but are available on request.

**eTable 3.** Differences in Type of Institution Between Included and Excluded Cases<sup>a</sup>

|                                                 | Included Cases<br>(n=6,261,955) | Excluded Cases<br>(n=13,955,260) | p      |
|-------------------------------------------------|---------------------------------|----------------------------------|--------|
| <i>Institution Type (%)</i>                     |                                 |                                  |        |
| University Hospital                             | 10.5<br>(10.5-10.5)             | 11.4<br>(11.1-11.5)              | <0.001 |
| Large Community Hospital                        | 17.5<br>(17.5-17.5)             | 21.4<br>(21.4-21.4)              | <0.001 |
| Medium Community Hospital                       | 43.2<br>(43.1-43.3)             | 40.4<br>(40.3-40.4)              | <0.001 |
| Small Community Hospital                        | 3.6<br>(3.5-3.6)                | 4.1<br>(4.1-4.1)                 | <0.001 |
| Specialty Hospital                              | 3.7<br>(3.7-3.8)                | 2.0<br>(1.9-2.0)                 | <0.001 |
| Attached Surgery Facility                       | 5.0<br>(5.0-5.0)                | 5.5<br>(5.4-5.5)                 | <0.001 |
| Freestanding Surgery Center                     | 16.5<br>(16.5-16.6)             | 13.9<br>(13.8-13.9)              | <0.001 |
| Pain Clinic, Surgeon's Office, or Dental Office | 0<br>(0-0)                      | 1.4<br>(1.4-1.4)                 | <0.001 |

<sup>a</sup>**Table 3** shows the percentage of cases performed at various surgical facility types (e.g. university hospital), stratified by cases in our final sample (“included cases”) and cases that were excluded. 95% confidence intervals shown in parentheses. “p-value” shows the significance of differences between the two groups as assessed by a chi-square test. Note that the sum of included plus excluded cases (20,217,215) is less than our initial sample of 26,568,734 since some cases had missing information about facility type.

**eTable 4.** Distribution of Surgical CPTs Between Included and Excluded Cases<sup>b</sup>

| Rank | Included Cases<br>(N=6,261,955) |                           |                   | Excluded Cases<br>(n=13,292,917) |                           |                   |
|------|---------------------------------|---------------------------|-------------------|----------------------------------|---------------------------|-------------------|
|      | CPT Code                        | Description               | N (%)             | CPT Code                         | Description               | N (%)             |
| 1    | 66984                           | Cataract Surgery          | 276,408<br>(4.4%) | 45378                            | Colonoscopy               | 606,862<br>(4.5%) |
| 2    | 45378                           | Colonoscopy               | 234,874<br>(3.8%) | 66984                            | Cataract Surgery          | 465,919<br>(3.5%) |
| 3    | 43235                           | EGD                       | 145,944<br>(2.3%) | 43235                            | EGD                       | 315,589<br>(2.4%) |
| 4    | 43239                           | EGD                       | 138,513<br>(2.2%) | 43239                            | EGD                       | 314,910<br>(2.4%) |
| 5    | 90870                           | Electroconvulsive Therapy | 132,867<br>(2.1%) | 27447                            | Total Knee Arthroplasty   | 218,888<br>(1.6%) |
| 6    | 47562                           | Cholecystectomy           | 130,210<br>(2.1%) | 47562                            | Cholecystectomy           | 211,943<br>(1.6%) |
| 7    | 59410                           | Vaginal Delivery          | 121,709<br>(1.9%) | 45380                            | Colonoscopy               | 198,605<br>(1.5%) |
| 8    | 27447                           | Total Knee Arthroplasty   | 117,589<br>(1.9%) | 59409                            | Vaginal Delivery          | 190,360<br>(1.4%) |
| 9    | 59409                           | Vaginal Delivery          | 112,440<br>(1.8%) | 29881                            | Knee Arthroscopy          | 172,362<br>(1.3%) |
| 10   | 29881                           | Knee Arthroscopy          | 105,513<br>(1.7%) | 99231                            | Office Visit              | 141,405<br>(1.1%) |
| 11   | 59514                           | Cesarean Section          | 86,404<br>(1.4%)  | 90870                            | Electroconvulsive Therapy | 132,007<br>(1.0%) |
| 12   | 69436                           | Myringotomy               | 85,802<br>(1.4%)  | 45385                            | Colonoscopy               | 129,573<br>(1.0%) |
| 13   | 42820                           | Tonsillectomy             | 82,815<br>(1.3%)  | 27130                            | Total Hip Arthroplasty    | 123,154<br>(1.0%) |
| 14   | 44970                           | Appendectomy              | 80,273<br>(1.3%)  | 59514                            | Cesarean Section          | 121,328<br>(0.9%) |
| 15   | 45380                           | Colonoscopy               | 78,505<br>(1.3%)  | 64721                            | Neuroplasty               | 105,946<br>(0.8%) |
| 16   | 27130                           | Total Hip Arthroplasty    | 72,485<br>(1.2%)  | 36620                            | Arterial Line Placement   | 104,245<br>(0.8%) |
| 17   | 41899                           | Dental Surgery            | 63,661<br>(1.0%)  | 58558                            | Hysteroscopy              | 101,374<br>(0.8%) |
| 18   | 49505                           | Hernia Repair             | 58,135<br>(0.9%)  | 44970                            | Appendectomy              | 98,221<br>(0.7%)  |
| 19   | 64721                           | Neuroplasty               | 57,242<br>(0.9%)  | 49505                            | Hernia Repair             | 96,122<br>(0.7%)  |
| 20   | 58588                           | Hysteroscopy              | 56,895<br>(0.9%)  | 29827                            | Knee Arthroscopy          | 92,094<br>(0.7%)  |

|    |       |                         |                  |       |                          |                  |
|----|-------|-------------------------|------------------|-------|--------------------------|------------------|
| 21 | 36620 | Arterial Line Placement | 53,589<br>(0.9%) | 62311 | Epidural Injection       | 89,196<br>(0.6%) |
| 22 | 47563 | Cholecystectomy         | 45,028<br>(0.7%) | 69436 | Myringotomy              | 80,237<br>(0.6%) |
| 23 | 45385 | Colonoscopy             | 42,667<br>(0.7%) | 63030 | Laminotomy               | 79956<br>(0.6%)  |
| 24 | 50590 | Lithotripsy             | 42,085<br>(0.7%) | 99100 | Anesthesia Modifier Code | 78791<br>(0.6%)  |
| 25 | 63030 | Laminotomy              | 41,858<br>(0.7%) | 42820 | Tonsillectomy            | 75886<br>(0.6%)  |

<sup>b</sup>**Table 4** shows the 25 most frequently surgical Current Procedural Terminology (CPT) codes reported for the anesthesia cases in our final sample (“included cases”) and for excluded cases (“excluded cases”) for which the surgical CPT code was reported. The table lists the CPT code, a description of the procedure associated with the code, and the number (and percentage) of cases for which the code was reported. These 25 codes accounted for 33% of all cases for excluded cases and 39% of included cases. Data for other CPT codes is available from the authors on request.



**eFigure. Distribution of Anesthesia Times**

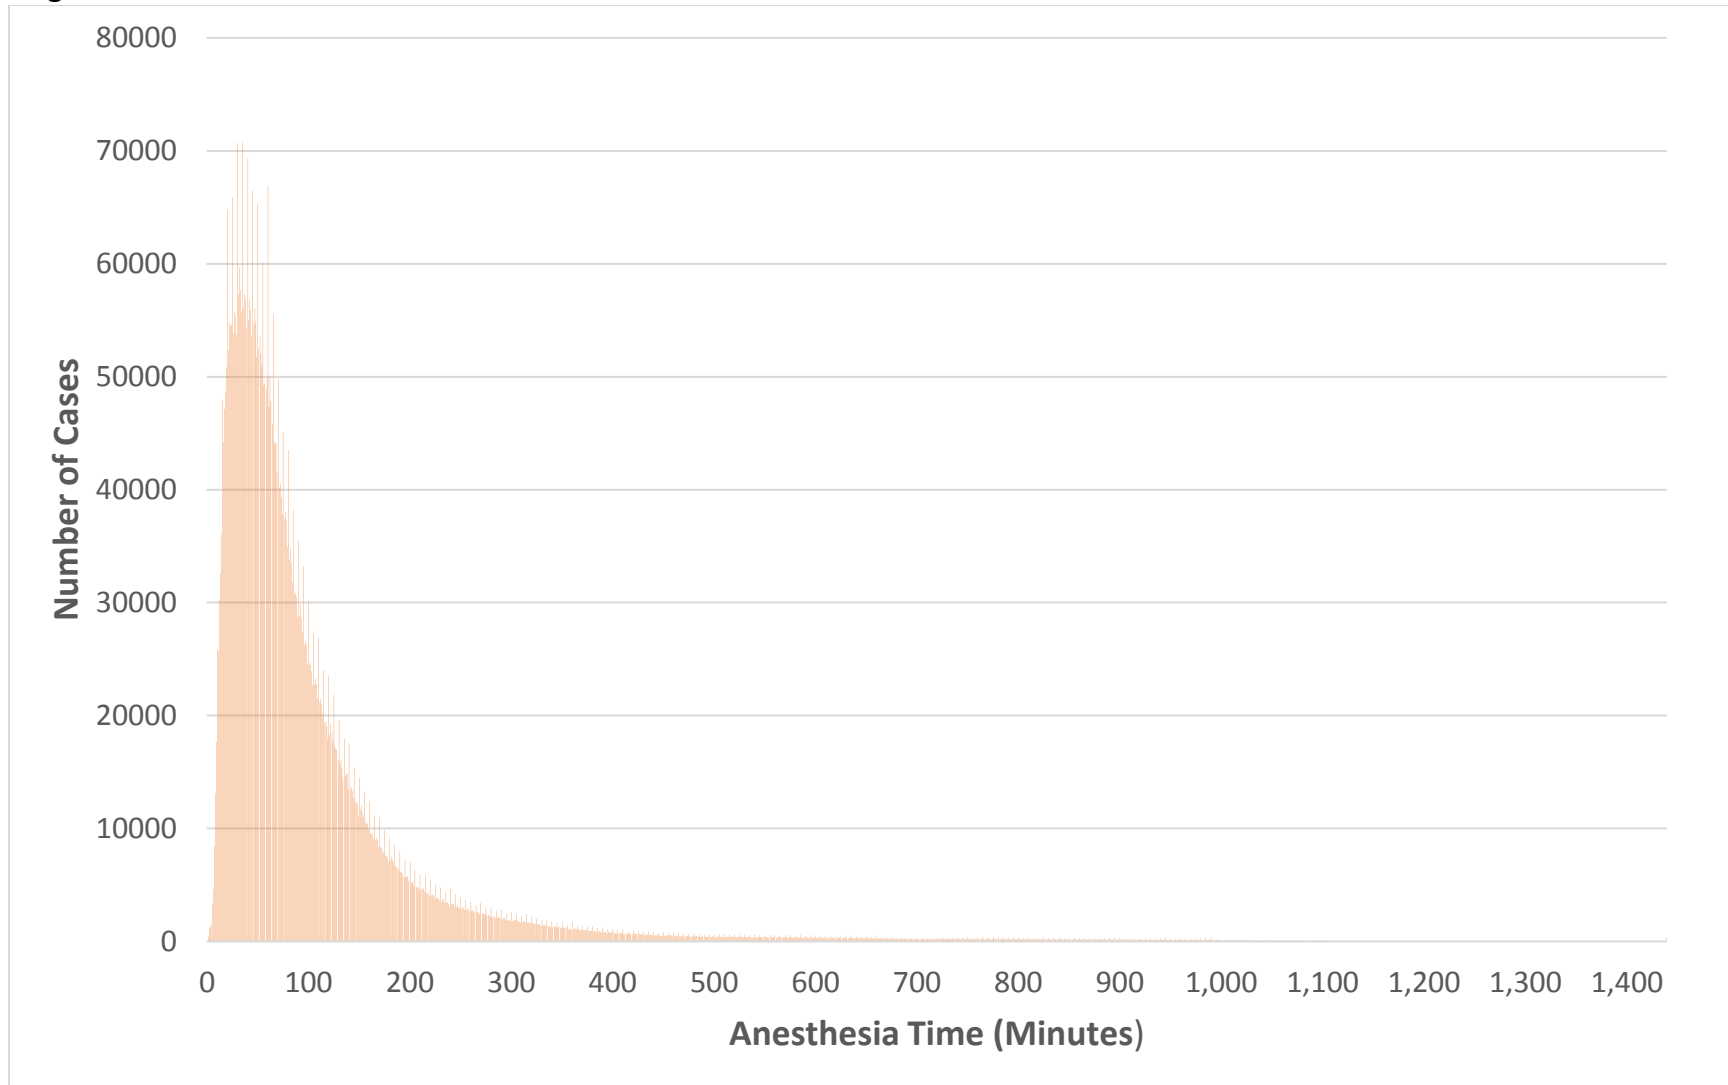

**eFigure** shows the distribution of anesthesia times for the 6,261,955 cases in our sample. The height for each column represents the number of cases with the reported anesthesia time (in minutes).



## eMethods. Regression Model

This section outlines the regression model used to estimate the expected anesthesia times. Our regression model is given by the following equation:

$$\ln(\text{time}_{ijkt}) = \text{surgery}_j + \delta_t + f_k + \Gamma X_i + \varepsilon_{ijkt} \quad (1)$$

The unit of observation for our analysis is the individual case (indexed by  $i$ ). In the equation above,  $j$  is an index for each type of procedure (based on the surgical CPT code),  $k$  indexes the facility, and  $t$  indexes the year the case took place.  $\text{surgery}_j$  is a fixed effect for the given surgical CPT,  $\delta_t$  is a year effect,  $f_k$  is a facility fixed effect, and  $X_i$  is a vector of patient characteristics including age, gender, and the presence of the comorbidities outlined in Appendix Table 1. In effect, the regression equation above estimates the expected time for a given anesthesia case by estimating the average time, after adjusting for surgery type, the year the surgery was performed, the facility where the surgery was performed, and patient characteristics including age, gender, and comorbidities. In estimating the equation above, we take the natural log of anesthesia time since, as shown in figure 1, the natural distribution of anesthesia times broadly resembles a log normal distribution. Regression results from equation (1) are shown in **eTable 4**.

We can use the estimated regression coefficients from equation (1) to obtain the predicted time for a given case. Since our regression equation used the natural log of anesthesia time as the dependent variable, the predicted value from equation (1) is *approximately* the natural log of the predicted time. However, we use Duan's smearing estimator to convert the predicted values from the equation above into the actual predicted time (measured in minutes).

Having obtained the predicted times for a given case, we then calculate the difference between the expected and observed times for each case. We then estimate the following linear regression:

$$\text{diff}_i = \alpha + \beta_1 \text{Top5}_i + \beta_2 \text{Next5}_i + \varepsilon_{ijkt} \quad (2)$$

where  $\text{diff}_i$  is the difference between the observed and the expected time for case  $i$ ,  $\text{Top5}_i$  is an indicator variable that equals one if the anesthesia for case  $i$  was in the top 5<sup>th</sup> percentile (in terms of reporting anesthesia times ending in a multiple of 5), and  $\text{Next5}_i$  is an indicator variable that equals one if the anesthesia practitioner was in the top 6<sup>th</sup> to 10<sup>th</sup> percentile (in terms of reporting anesthesia times ending in a multiple of 5).  $\beta_1$  and  $\beta_2$  are our coefficients of interest, and represent the average amount by which observed anesthesia times for practitioners in these two groups exceed the expected times, compared to practitioners not in these two groups. For example, if  $\beta_1$  equals 30, this would imply that observed times for anesthesia practitioners in the top 5<sup>th</sup> percentile exceed expected times by 30 minutes more compared to other anesthesia practitioners. In estimating equation (2), we cluster our standard errors at the practitioner level.
